# Supplementary material
Source: publisher site journal article supplement (https://www.dovepress.com/article/445398)
Supplement: Supplementary file 1 [file get_supplementary_file.php]

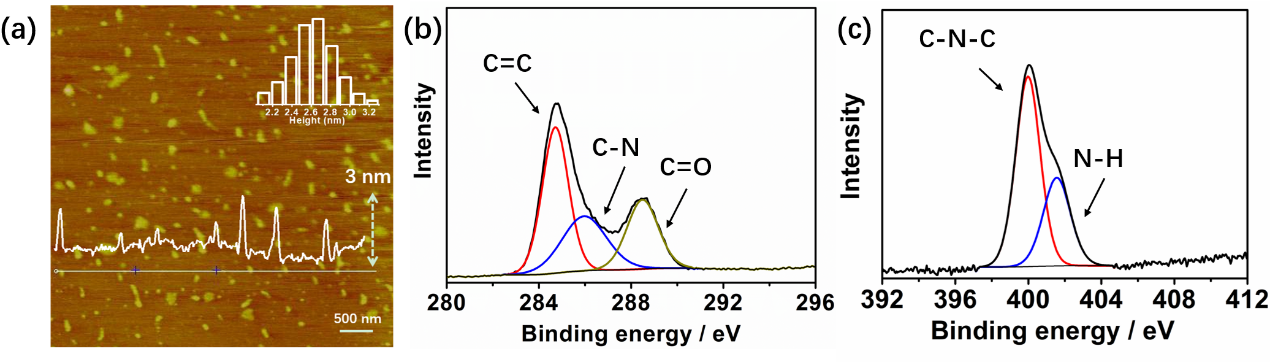


Figure S1 The characterization of NGQDs （a. The AFM image of NGQDs；b. XPS C1s spectra of NGQDs; c. XPS N1s spectra of NGQDs）


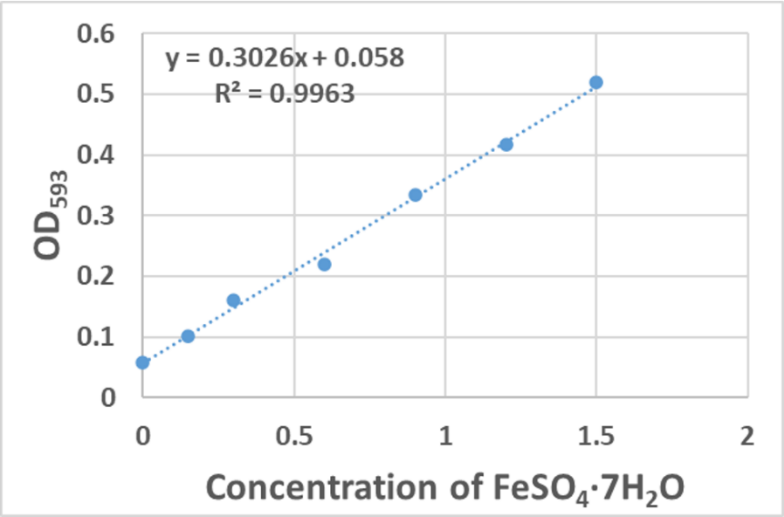


Figure S2 The standard curve of FeSO4·7H2O of FRAP method.


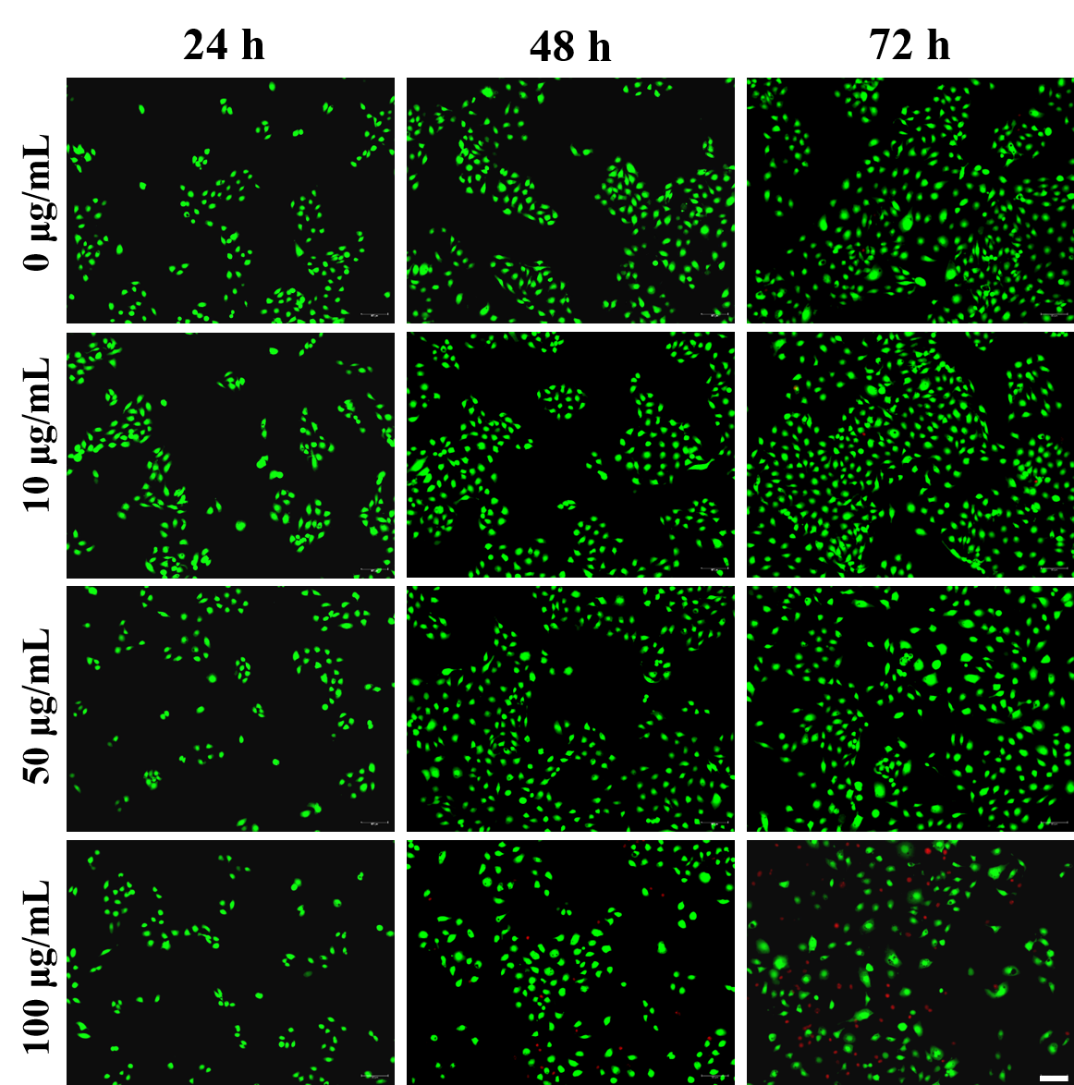


Figure S3 Live/dead double staining of human corneal epithelial cells (HCECs) following treatment with varying concentrations of nitrogen-doped graphene quantum dots (NGQDs) for 24, 48, or 72 h (scale bar: 100 μm).


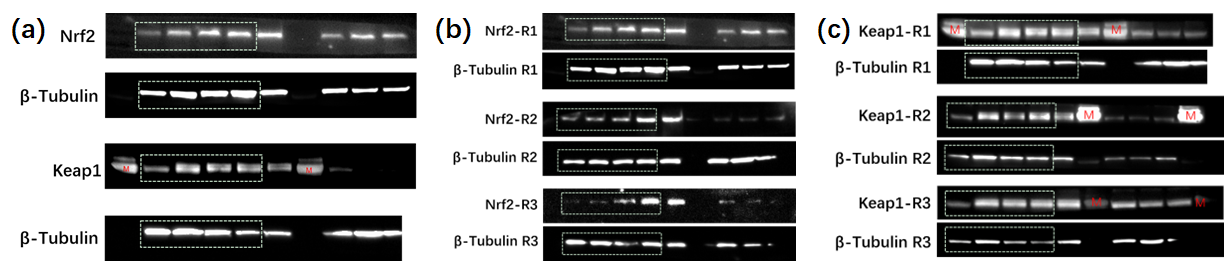


Figure S4 (a) The original images of WB in Figure 3a-3b; (b) The three repeats of WB image against Nrf2 protein; (c) The three repeats of WB image against Keap1 protein


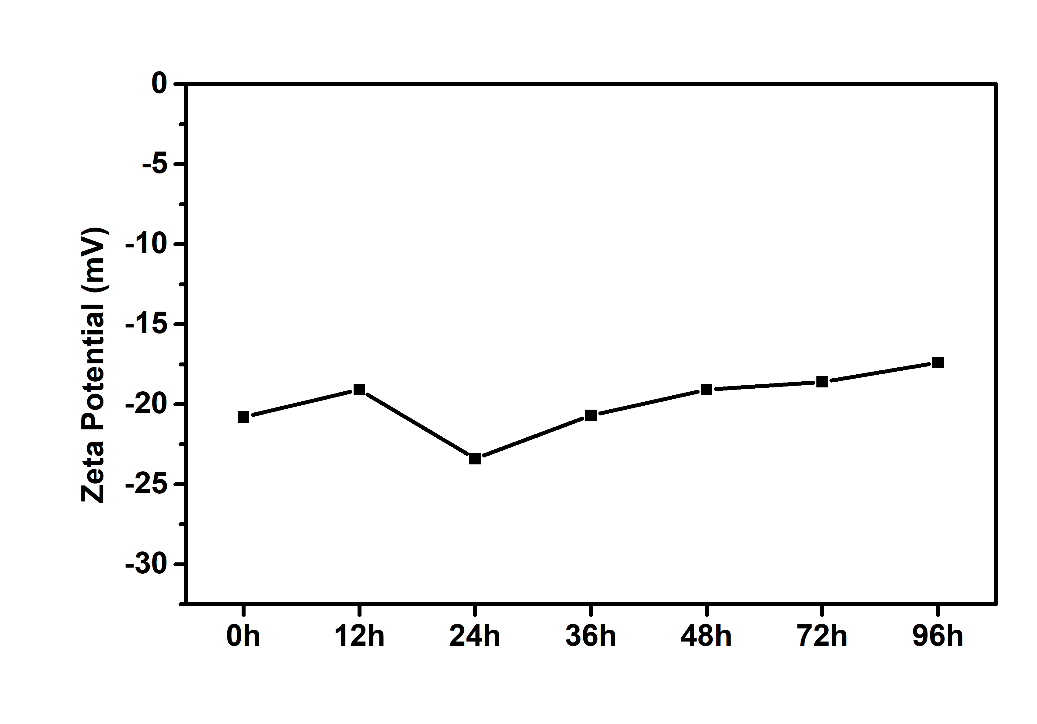


Figure S5 The zeta potential stability of RGDS@NGQDs F127 during 96 h at room temperature.


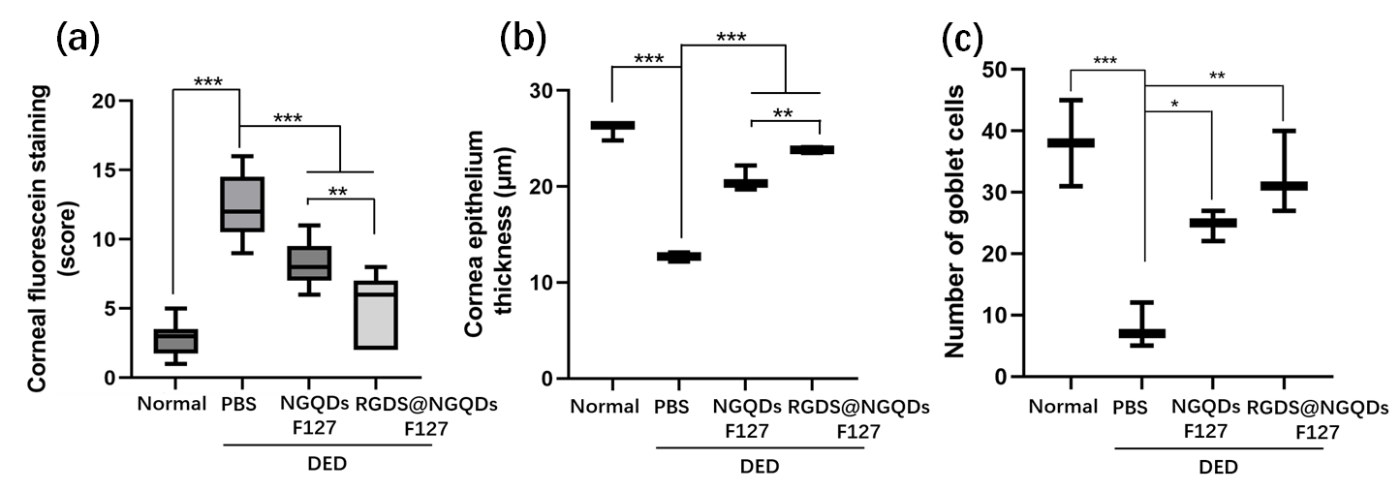


Figure S6. (a) The corneal fluorescein staining score; (b) Statistic analysis of the thickness of the corneal epithelium; (c) Mean number of goblet cells.
